# Supplementary material for: National survey on dose data analysis in computed tomography
Source: Springer Nature journal article supplement (doi:10.1007/s00330-018-5408-0), 2018-05-28
Supplement: MOESM1 [file 15797320]

1. What is the type of your hospital?

- Public hospital (in- and out-patient services)
- Private hospital (in- and out-patient services)
- Private institutions (out-patient services only)

1. Please state your professional background:

- Radiologist
- Radiographer
- Medical physicist

1. How many computed tomography (CT) scanners are in clinical use in your department (without PET/CT and SPECT/CT)?

- 1
- 2
- 3
- 4
- ______ (exact number)

1. How many CT scans do you perform with your scanner each year? (1 patient = 1 scan)

- _______number of patients

1. Where do you collect dose data of the CT scans?

- In the PACS (screenshot of exposition data) and in addition to that data is transferred to an external data base
- Only in the PACS (screenshot of exposition data)
- Different method (please specify): _______

1. If you do not perform a systematic analysis of CT exposition data, please state reasons why you refrain from doing so? (in this case, the survey is finished for you here)

- ________________

1. If you do perform a systematic analysis, how long is the interval between two assessments?

- ____________

1. How do you analyze dose data?

- Dose-Management-Software (DMS)
- Manually (I do spot checks)
  - purchase of a DMS is planned

1. If you do use a DMS, please give the name of the vendor

- DoseWatch™ (GE)
- DoseWise™ (Philips)
- Radimetrics™ (Bayer)
- Tqm/Dose™ (AGFA)
- ____________________________

1. Who can access the DMS in clinical routine?

- Chief physician and his/her deputies
- Consultants
- Residents
- Radiographers
- Medical physicists
- IT-specialists
- Data is part of a large external data base and therefore no direct access is possible.
- Data is analyzed manually (see question No. 8)

1. Do you have a dose team within your department (= team which meets on a regular basis in order to improve radiation protection, e.g. specific dose data analysis to develop measures for further dose reduction)?

- Yes
- No

1. If you do have a dose team, who are its members?

- Chief physician and his/her deputies
- Consultants
- Residents
- Radiographers
- Medical physicists
- IT-specialists

1. If you do have a dose team, who has the lead in analyzing dose data (either with a DMS or manually)?

- Chief physician and his/her deputies
- Consultants
- Residents
- Radiographers
- Medical physicists
- IT-specialists

1. Do you communicate results of dose data analysis within the departments (e.g. by means of a meeting)?

- Yes
- No

1. Do you analyze dose data directly upon completion of the scan (i.e. do you assess whether an individual patient´s dose data lies within the Diagnostic Reference Levels)?

- Yes
- No, but technically possible
- No, currently technically impossible

1. Do you use the Diagnostic Reference Levels (DRLs) provided by the National Office of Health?

- Yes
- No

1. Do you have own, department-specific DRLs?

- Yes
- No

1. Do you add a patient’s dosimetric information to the examination report?

- Yes
- No

1. If yes, which parameters do you provide?

- Total Dose-Length-Product (DLP)
- CT dose index (CTDIvol) of single series
- Size-specific dose estimate (SSDE)
- Effective dose (mSv)
- ____________________________

1. Which other modalities do you additionally analyze with a DMS?

- Conventional X-ray
- Mammography
- Angiography/Interventional radiology
- Fluoroscopy
- Currently no DMS installed/DMS only used for CT.

1. If you do have a DMS, how do you evaluate its benefit-cost-ratio?

- DMS improves and accelerates dose data analysis – costs are justified.
- DMS improves and accelerates dose data analysis; however, costs are too high regarding:
  - Investment/purchase
  - Adaptation of the infrastructure and/or workflow
  - Personal resources
- Analyses/reports provided by the DMS are of little benefit/useless to me; therefore, its costs are not justified.

Thank you for your participation until 09/15/2017.
